# Supplementary material for: Without Assumptions: Development of a Socio-Emotional Learning Framework That Reflects Community Values in Cameroon
Source: Front Public Health. 2021 May 7;9:602546. doi: 10.3389/fpubh.2021.602546 (PMC8137823; doi:10.3389/fpubh.2021.602546)
Supplement: Annex 1 — Teacher Questionnaire. [file Table_1.pdf]

## Questionnaire à l'Animateur – Développement Socio-Emotionnel de l'Enfant

- | #  | QUESTIONS                                                                                                                                   |
|----|---------------------------------------------------------------------------------------------------------------------------------------------|
| 1  | Yandɛ é à gapà èé kè e tɛ nè tɛ lɛ biè Yandɛ o. <i>L'enfant partage avec les autres enfants.</i>                                            |
| 2  | Yandɛ bà ngomà tɛ lè biɛ Yandɛ o jókò (E jókò bo). <i>L'enfant parle bien aux autres enfants (est gentil).</i>                              |
| 3  | Yandɛ éà gbɛ lè bièò à na tomà jokò na dotò a ngéó. <i>L'enfant amène les autres à suivre son exemple.</i>                                  |
| 4  | Yandɛ é à tɔ tìtìl pe kobo na gbao. <i>L'enfant est poli envers des grandes personnes de la communauté.</i>                                 |
| 5  | Yandɛ é à jukò koboo kobo na gbao. <i>L'enfant salut grandes personnes de la communauté.</i>                                                |
| 6  | Yandɛ é à meè èe kòpɛ kè kobo na gbao wó à manà pé nè. <i>L'enfant fait tous que les grandes personnes du village lui dit.</i>              |
| 7  | Yandɛ bà jɛ lewù kèò kobo na gbao wó à manà pé nè. <i>L'enfant écoute les conseils des grandes personnes du village.</i>                    |
| 8  | Yandɛ bà meè bèlà a ngé jókò (bèlà kè é meè jókò nè). <i>L'enfant fait bien son travail (un travail de qualité).</i>                        |
| 9  | Pe boo wá do tɛ we, Yandɛ ndé na gelo. <i>Si les gens viennent avec les problèmes, l'enfant ne réagit pas.</i>                              |
| 10 | Yandɛ é meé kɔlɛ tɛ biè lè Yandɛo ode. <i>L'enfant ne bagarre pas avec les autres enfants.</i>                                              |
| 11 | Yandɛ tɛ na njì a kɛ na jè kabu ndé pe kobo à yangé. <i>L'enfant peut se calmer après qu'il/elle se fâche, sans l'aide d'un adulte.</i>     |
| 12 | Éà gbo bibi tɛ bo à tie kè a meèlè sítì tɛ bo nè. <i>L'enfant demande pardon après avoir fait du mal à quelqu'un.</i>                       |
| 13 | Yandɛ é gboò éeo ode. <i>L'enfant n'arrache pas des choses.</i>                                                                             |
| 14 | Yandɛ bà yangà boo a bèlà a ngó. <i>L'enfant aide les autres en besoin.</i>                                                                 |
| 15 | Yandɛ é tɛ bume na yuwà, éà jè pe na biyékè bié bo bà jè nè. <i>L'enfant a un cœur de pitié. Il comprend comment les autres se ressent.</i> |
| 16 | Yandɛ bà lé bèlà ná totɔo ndé na jè gò. <i>L'enfant tente des nouvelles activités sans peur.</i>                                            |

[illegible]
