# Supplementary material for: Without Assumptions: Development of a Socio-Emotional Learning Framework That Reflects Community Values in Cameroon
Source: Front Public Health. 2021 May 7;9:602546. doi: 10.3389/fpubh.2021.602546 (PMC8137823; doi:10.3389/fpubh.2021.602546)
Supplement: Annex 2 — Caregiver Questionnaire. [file Table_2.pdf]

# Questionnaire des Parents – Développement Socio-Emotionnel de l'Enfant

Village \_\_\_\_\_ Date \_\_\_\_\_

Nom de l'enfant \_\_\_\_\_ Age de l'enfant \_\_\_\_\_ Sexe de l'enfant \_\_\_\_\_

|                                                                                                                                                                                                                     |                                                                                                                                                                                                                                                                                                                                                                                                     |
|---------------------------------------------------------------------------------------------------------------------------------------------------------------------------------------------------------------------|-----------------------------------------------------------------------------------------------------------------------------------------------------------------------------------------------------------------------------------------------------------------------------------------------------------------------------------------------------------------------------------------------------|
| <p><b>Kɛ là mò é à doto tɛ a mɛɛ sɔ̀lɔ́ á to biè yandɛo pɛ?</b><br/> <b>Parle-moi de comment il joue et s'entend avec les enfants.</b></p>                                                                          |                                                                                                                                                                                                                                                                                                                                                                                                     |
| <p>1. Kè e bà wótò pɛ a tie kè nɔ̀ bɔ̀ wó à jè tɛ gomò èè a ngé nè ?<br/> <b>Partager.</b> Qu'est-ce qui se passe quand un autre enfant veut de ses choses ?</p>                                                    | <p>É à gapà èè kè e tɛ nɛ tɛ lè bɔ̀.<br/> <i>L'enfant partage avec les autres enfants</i><br/> <input type="checkbox"/> Maitrisé <input type="checkbox"/> Presque maitrisé <input type="checkbox"/> En cours de maitrise<br/> <input type="checkbox"/> Un peu maitrisé <input type="checkbox"/> non-maitrisé <input type="checkbox"/> ne sait pas.</p>                                              |
| <p>2. Yandɛ é à ngomà tɛ bɔ̀ pɛ ?<br/> <b>Insulter.</b> Comment est-ce que ton enfant parle aux amies quand il joue ?</p>                                                                                           | <p>É à ngomà tɛ bɔ̀ jókò.<br/> <i>L'enfant parle bien aux autres enfants (est gentil).</i><br/> <input type="checkbox"/> Maitrisé <input type="checkbox"/> Presque maitrisé <input type="checkbox"/> En cours de maitrise<br/> <input type="checkbox"/> Un peu maitrisé <input type="checkbox"/> non-maitrisé <input type="checkbox"/> ne sait pas.</p>                                             |
| <p>3. Tɛ pɛ làa mò bà lɛ lòtì a ngéó ? Bà pɛ wá mɛɛ èè kè e jókò a mɛɛ de nè ?<br/> <b>Imiter :</b> Est-ce que ton enfant imite souvent ses amies ? Même quand ils font quelque chose qu'il ne faut pas faire ?</p> | <p>É à gbiè lè bɔ̀ à na tomà jókò na dotò a ngéó.<br/> <i>L'enfant amène les autres à suivre son exemple.</i><br/> <input type="checkbox"/> Maitrisé <input type="checkbox"/> Presque maitrisé <input type="checkbox"/> En cours de maitrise<br/> <input type="checkbox"/> Un peu maitrisé <input type="checkbox"/> non-maitrisé <input type="checkbox"/> ne sait pas.</p>                          |
| <p><b>Kè là a mò e a dòto a la koboo pɛ ?</b><br/> <b>Comment est-ce que ton enfant se comporte envers des grandes personnes ?</b></p>                                                                              |                                                                                                                                                                                                                                                                                                                                                                                                     |
| <p>4 et 5. Kà là a mò bà ngomà á là kobo à boo pɛ ?<br/> <b>Parler.</b> Comment est-ce que ton enfant parle aux grandes personnes ?</p>                                                                             | <p>4. É à tɔ̀ tìlì pɛ koboo.<br/> <i>L'enfant est poli envers des grandes personnes</i><br/> <input type="checkbox"/> Maitrisé <input type="checkbox"/> Presque maitrisé <input type="checkbox"/> En cours de maitrise<br/> <input type="checkbox"/> Un peu maitrisé <input type="checkbox"/> non-maitrisé <input type="checkbox"/> ne sait pas.</p>                                                |
|                                                                                                                                                                                                                     | <p>5. É à jukò koboo a kpàje à tie kè wó tɔ̀ wó à makà tɛ nè.<br/> <i>L'enfant salut les grandes personnes gens quand il les voit.</i><br/> <input type="checkbox"/> Maitrisé <input type="checkbox"/> Presque maitrisé <input type="checkbox"/> En cours de maitrise<br/> <input type="checkbox"/> Un peu maitrisé <input type="checkbox"/> non-maitrisé <input type="checkbox"/> ne sait pas.</p> |
| <p>6. Là a mò e a mɛɛ pɛ à tie kɛ koboo wo a kindé tɛ a tima nè ?<br/> <b>Commissions.</b> Quand une grande personne lui demande de faire une commission, qu'est-ce qu'il fait ?</p>                                | <p>É à mɛɛ èè kòpɛ kè kobò wó à manà pɛ nè.<br/> <i>L'enfant fait tous que les grandes personnes lui dit.</i><br/> <input type="checkbox"/> Maitrisé <input type="checkbox"/> Presque maitrisé <input type="checkbox"/> En cours de maitrise<br/> <input type="checkbox"/> Un peu maitrisé <input type="checkbox"/> non-maitrisé <input type="checkbox"/> ne sait pas.</p>                          |
| <p>7. Kè là a mò bà mɛɛ pɛ a tie kɛ koboo wo à tɔ̀ pɛ lewu nè ?<br/> <b>Ecouter.</b> Quand une grande personne le donne des conseils, qu'est-ce que ton enfant fait ?</p>                                           | <p>E yandɛ kɛ é à jè lewu kòpɛ kè koboo à manà pɛ nè.<br/> <i>L'enfant écoute les conseils des grandes personnes.</i><br/> <input type="checkbox"/> Maitrisé <input type="checkbox"/> Presque maitrisé <input type="checkbox"/> En cours de maitrise<br/> <input type="checkbox"/> Un peu maitrisé <input type="checkbox"/> non-maitrisé <input type="checkbox"/> ne sait pas.</p>                  |
| <p><b>Kè là a mò bà mɛɛ bèlà nà ndao pɛ ?</b><br/> <b>Comment est-ce que ton enfant travail à la maison ? Parle-moi de comment ton enfant travail à la maison</b></p>                                               |                                                                                                                                                                                                                                                                                                                                                                                                     |
| <p>8. Tɛ pɛ là a mò bà mɛɛ bèlà a nda tie kòpɛ ?<br/> <b>Travailler.</b> Est-ce que ton enfant fait des travaux régulièrement à la maison ?</p>                                                                     | <p>É à yangà boo a ngéó a bèlà nà ndao tɛ nɔ̀ lè bèlào<br/> <i>Il aide les gens dans les travaux de la maison et bien d'autres.</i><br/> <input type="checkbox"/> Maitrisé <input type="checkbox"/> Presque maitrisé <input type="checkbox"/> En cours de maitrise<br/> <input type="checkbox"/> Un peu maitrisé <input type="checkbox"/> non-maitrisé <input type="checkbox"/> ne sait pas.</p>    |
| <p>18. A tie kè làa mò bà mɛɛ tɛ bèlà nè, moà sià pɛ e mɛɛ jókò à tie kòpɛ ?<br/> <b>Qualité.</b> Est-ce que ton enfant finit ses travaux sans se distraire ?</p>                                                   | <p>Yandɛ bà nɔ̀ jókò à tie kè é à mɛɛ tɛ bèlà.<br/> <i>L'enfant fait bien son travail sans distraction.</i><br/> <input type="checkbox"/> Maitrisé <input type="checkbox"/> Presque maitrisé <input type="checkbox"/> En cours de maitrise<br/> <input type="checkbox"/> Un peu maitrisé <input type="checkbox"/> non-maitrisé <input type="checkbox"/> ne sait pas.</p>                            |
| <p><b>Kè là a mò bà mɛɛ pɛ a tie kɛ é à jè tɛ kabu nɛ ?</b><br/> <b>Comment est-ce que ton enfant réagit quand il n'est pas content ?</b></p>                                                                       |                                                                                                                                                                                                                                                                                                                                                                                                     |
| <p>9. Kè e mɛɛ ngi pɛ a tie kè nɔ̀ yandɛ congì à gele tɛ kòlɛ nè ?</p>                                                                                                                                              | <p>9. Bɔ̀ wó ko na gele tɛ wɛ é à dòto dòto ndé na gelo.<br/> <i>Si les gens viennent avec les problèmes, l'enfant ne réagit pas.</i><br/> <input type="checkbox"/> Maitrisé <input type="checkbox"/> Presque maitrisé <input type="checkbox"/> En cours de maitrise</p>                                                                                                                            |

|                                                                                                                                                                                     |                                                                                                                                                                                                                                                                                                                                                                                                                                                                               |
|-------------------------------------------------------------------------------------------------------------------------------------------------------------------------------------|-------------------------------------------------------------------------------------------------------------------------------------------------------------------------------------------------------------------------------------------------------------------------------------------------------------------------------------------------------------------------------------------------------------------------------------------------------------------------------|
| <b>Agir.</b> Parle-moi d'un temps qu'un autre enfant voulait bagarrer avec lui. Comment a-t-il réagi ?                                                                              | <input type="checkbox"/> Un peu maîtrisé <input type="checkbox"/> non-maîtrisé <input type="checkbox"/> ne sait pas.<br><b>10.</b> É geè lè biɔɔ tɛ kɔlɛ ode.<br><i>L'enfant ne bagarre pas avec les autres enfants.</i><br><input type="checkbox"/> Maîtrisé <input type="checkbox"/> Presque maîtrisé <input type="checkbox"/> En cours de maîtrise<br><input type="checkbox"/> Un peu maîtrisé <input type="checkbox"/> non-maîtrisé <input type="checkbox"/> ne sait pas. |
| <b>11.</b> A tie kè yandɛ bà jè tɛ kabu nè, é à mɛɛ pe à na bɛ tɛ kabu.<br><b>Calmer.</b> Quand ton enfant se fâche, est-ce qu'il/elle se calme facilement ?                        | Yandɛ e tɛ tie na njì a kɛ na jè kabu ndé pe kobo a yangé.<br><i>L'enfant peut se calmer après qu'il/elle se fâche, sans l'aide d'un adulte.</i><br><input type="checkbox"/> Maîtrisé <input type="checkbox"/> Presque maîtrisé <input type="checkbox"/> En cours de maîtrise<br><input type="checkbox"/> Un peu maîtrisé <input type="checkbox"/> non-maîtrisé <input type="checkbox"/> ne sait pas.                                                                         |
| <b>12.</b> E à mɛɛ pe à tie kè a mɛɛ lɛ tɛ èè nà sítí tɛ bo nè ?<br><b>Pardoner.</b> Que fait-il quand il fait du mal à quelqu'un ?                                                 | É à gbo bibi tɛ bo a tie kè é à mɛɛ tɛ siti nè.<br><i>Il demande pardon après avoir fait du mal à quelqu'un</i><br><input type="checkbox"/> Maîtrisé <input type="checkbox"/> Presque maîtrisé <input type="checkbox"/> En cours de maîtrise<br><input type="checkbox"/> Un peu maîtrisé <input type="checkbox"/> non-maîtrisé <input type="checkbox"/> ne sait pas.                                                                                                          |
| <b>Là a mò bà mɛɛ pé à tie kè e à ye tɛ èè a boo nè ?</b><br><b>Comment est-ce que ton enfant fait quand il/elle veut quelque chose qui ne l'appartient pas ?</b>                   |                                                                                                                                                                                                                                                                                                                                                                                                                                                                               |
| <b>13.</b> Manà pe èè kè é à mɛɛ nè a tie kè é à ye tɛ èè a boo nè.<br><b>Arracher.</b> Parle-moi de ce qu'il/elle fait quand il/elle veut quelque chose qui appartient à d'autrui. | É gbo èè a biɔ ndé na yì ode<br><i>L'enfant n'arrache pas des choses</i><br><input type="checkbox"/> Maîtrisé <input type="checkbox"/> Presque maîtrisé <input type="checkbox"/> En cours de maîtrise<br><input type="checkbox"/> Un peu maîtrisé <input type="checkbox"/> non-maîtrisé <input type="checkbox"/> ne sait pas.                                                                                                                                                 |
| <b>Kè là a mò e bà mɛɛ pe à na sià gomò è a biɔ ?</b><br><b>Comment est-ce que ton enfant perçoit les besoins des autres ?</b>                                                      |                                                                                                                                                                                                                                                                                                                                                                                                                                                                               |
| <b>14.</b> Manà pè èè kɛ e a mɛɛ à tie kè nɔɔ bo a ye yangà nè ?<br><b>Aider.</b> Parle-moi de ce qu'il fait quand quelqu'un a besoin d'aide.                                       | Yandɛ ná é bà yangà boo a bèl à a ngó.<br><i>L'enfant aide les autres en besoin.</i><br><input type="checkbox"/> Maîtrisé <input type="checkbox"/> Presque maîtrisé <input type="checkbox"/> En cours de maîtrise<br><input type="checkbox"/> Un peu maîtrisé <input type="checkbox"/> non-maîtrisé <input type="checkbox"/> ne sait pas.                                                                                                                                     |
| <b>15.</b> Kè là a mò e bà mɛɛ pe à tie kè biè bo tɛ a yuwa nè ?<br><b>Compatir.</b> Qu'est-ce que ton enfant fait si son ami est triste ?                                          | Yandɛ na bume na yuwa.<br><i>L'enfant a un cœur de pitié. Il comprend comment les autres se ressent.</i><br><input type="checkbox"/> Maîtrisé <input type="checkbox"/> Presque maîtrisé <input type="checkbox"/> En cours de maîtrise<br><input type="checkbox"/> Un peu maîtrisé <input type="checkbox"/> non-maîtrisé <input type="checkbox"/> ne sait pas.                                                                                                                 |
| <b>Te pe là a mo, e a ye pe e mɛɛ èè a ngɛ ngɛ mòmolò nde a ye pe wo yangè ?</b><br><b>Est-ce que ton veut faire des choses indépendamment ?</b>                                    |                                                                                                                                                                                                                                                                                                                                                                                                                                                                               |
| <b>16.</b> É a mɛɛ pe à tie na mɛɛ nɔɔ èè kè é mɛlɛ so nè?<br><b>Tenter :</b> Comment agit-il face à une nouvelle tâche ou activité qu'il n'a jamais fait ?                         | Yandɛ na e tɛ kpéké na ye na mɛɛ èè na tòtɔ.<br><i>L'enfant tente des nouvelles activités sans peur.</i><br><input type="checkbox"/> Maîtrisé <input type="checkbox"/> Presque maîtrisé <input type="checkbox"/> En cours de maîtrise<br><input type="checkbox"/> Un peu maîtrisé <input type="checkbox"/> non-maîtrisé <input type="checkbox"/> ne sait pas.                                                                                                                 |
| <b>17.</b> A tie kè é à nyè tɛ ngo nè, tɛ é à ye pe nɔɔ boo e yangé ?<br><b>Se laver.</b> Quand il/elle se lave, est-ce qu'il/elle veut que tu l'aide ?                             | Yandɛ bà ye na nyè ngo nde na ye yanga koboo (a bo nɔɔ tie e tɛ a ye pe wó yangé).<br><i>L'enfant veut se laver sans l'aide de ses parents (mais peut parfois avoir besoin d'appui).</i><br><input type="checkbox"/> Maîtrisé <input type="checkbox"/> Presque maîtrisé <input type="checkbox"/> En cours de maîtrise<br><input type="checkbox"/> Un peu maîtrisé <input type="checkbox"/> non-maîtrisé <input type="checkbox"/> ne sait pas.                                 |
